# Supplementary material
Source: PubMed Central journal article supplement (PMC3055708)
Supplement: supptables.pdf [file supptables.pdf]

**SUPPLEMENTAL MATERIAL**

Supplemental Table 1. *Partial correlations for food consumption and body composition traits prior to and following 6 days of wheel access at 8 weeks of age for the entire G<sub>4</sub> population*

| Trait                 | Mass (g)<br><i>pre</i> | Mass (g)<br><i>post</i> | % Change in<br>% Mass | % Fat<br><i>pre</i> | % Fat<br><i>post</i> | % Change in<br>% Fat | % Lean<br><i>pre</i> | % Lean<br><i>post</i> | % Change in<br>% Lean |
|-----------------------|------------------------|-------------------------|-----------------------|---------------------|----------------------|----------------------|----------------------|-----------------------|-----------------------|
| Food Consumed (g)     | 0.042                  | 0.362**                 | 0.489**               | -0.603**            | -0.143*              | 0.447**              | 0.579**              | 0.164**               | -0.518**              |
| Mass (g), <i>pre</i>  |                        | 0.866**                 | -0.559**              | 0.371**             | 0.149**              | -0.247**             | -0.391**             | -0.130*               | 0.329**               |
| Mass (g), <i>post</i> |                        |                         | -0.081*               | 0.107*              | 0.176**              | 0.040                | -0.125*              | -0.181**              | -0.003                |
| % Change in mass      |                        |                         |                       | -0.558**            | 0.008                | 0.578**              | 0.566**              | -0.058                | -0.665**              |
| % Fat, <i>pre</i>     |                        |                         |                       |                     | 0.558**              | -0.457**             | -0.961**             | -0.472**              | 0.700**               |
| % Fat, <i>post</i>    |                        |                         |                       |                     |                      | 0.429**              | -0.537**             | -0.896**              | -0.092*               |
| % Change in % fat     |                        |                         |                       |                     |                      |                      | 0.438**              | -0.407**              | -0.779**              |
| % Lean, <i>pre</i>    |                        |                         |                       |                     |                      |                      |                      | 0.474**               | -0.738**              |
| % Lean, <i>post</i>   |                        |                         |                       |                     |                      |                      |                      |                       | 0.241**               |

Pearson partial correlations (*r*) controlling for parent-of-origin, sex, and parity. \**P* < 0.05, \*\**P* < 0.0001 following correction for multiple comparisons utilizing the false discovery rate procedure (11). Food consumption was quantified as the amount eaten over the entire 6-day access to running wheels. At 8 weeks of age body composition measures were taken immediately prior to (*pre*) and following (*post*) 6 days of wheel access. Percent body fat (and lean) was calculated as (fat mass/body mass)\*100. Percent change variables were calculated as [(*post* – *pre*)/*pre*]\*100.

Supplemental Table 2. *Partial correlations for body composition traits at 4, 6 and 8 weeks of age for the entire G<sub>4</sub> population*

| Trait                  | <i>~4 weeks of age</i> |          | <i>~6 weeks of age</i> |          |          | <i>~8 weeks of age</i> |          |          |
|------------------------|------------------------|----------|------------------------|----------|----------|------------------------|----------|----------|
|                        | % Fat                  | % Lean   | Body mass              | % Fat    | % Lean   | Body mass              | % Fat    | % Lean   |
| <i>~4 weeks of age</i> |                        |          |                        |          |          |                        |          |          |
| Body mass              | 0.281**                | -0.302** | 0.710**                | 0.156**  | -0.156** | 0.648**                | 0.201**  | -0.231** |
| % Fat                  |                        | -0.910** | 0.134*                 | 0.628**  | -0.534** | 0.117*                 | 0.445**  | -0.418** |
| % Lean                 |                        |          | -0.081*                | -0.568** | 0.489**  | -0.053                 | -0.391** | 0.366**  |
| <i>~6 weeks of age</i> |                        |          |                        |          |          |                        |          |          |
| Body mass              |                        |          |                        | 0.200**  | -0.204** | 0.877**                | 0.282**  | -0.317** |
| % Fat                  |                        |          |                        |          | -0.886** | 0.168**                | 0.752**  | -0.702** |
| % Lean                 |                        |          |                        |          |          | -0.094*                | -0.680** | 0.656**  |
| <i>~8 weeks of age</i> |                        |          |                        |          |          |                        |          |          |
| Body mass              |                        |          |                        |          |          |                        | 0.367**  | -0.390** |
| % Fat                  |                        |          |                        |          |          |                        |          | -0.947** |

Eight week measurements were prior to 6 days of wheel access. Pearson partial correlations (*r*) controlling for parent-of-origin, sex, and parity. \*  $P < 0.05$ , \*\*  $P < 0.0001$  following correction for multiple comparisons utilizing the false discovery rate procedure (11).

Supplemental Table 3. *QTL detected and respective statistics for body composition traits and food consumption. Values represent LOD scores from simple mapping output that were significant at the genome-wide level ( $P \leq 0.05$ ,  $LOD \geq 3.9$ ), but did not remain significant or suggestive ( $P \leq 0.1$ ,  $LOD \geq 3.5$ ) following the GRAIP procedure (and hence are not depicted in Table 2 of the primary text)*

| Trait                  | Nearest Marker | MMU | Peak Position (Mb) | Naive LOD | GRAIP LOD | CI (Mb) | % Var | Additive $\pm$ SE          | Dominance $\pm$ SE |
|------------------------|----------------|-----|--------------------|-----------|-----------|---------|-------|----------------------------|--------------------|
| <i>~4 weeks of age</i> |                |     |                    |           |           |         |       |                            |                    |
| Body mass (g)          | JAX00573023    | 5   | 7                  | 4.6       | 2.3       | -25     | 1.5   | -0.5 $\pm$ 0.1             | -0.2 $\pm$ 0.2     |
|                        | JAX00139528    | 6   | 33                 | 6.8       | 2.9       | 22-45   | 1.5   | 0.5 $\pm$ 0.1              | -0.1 $\pm$ 0.2     |
|                        | JAX00160567    | 8   | 37                 | 4.4       | 2.0       | 27-74   | 2.5   | 0.4 $\pm$ 0.1              | 0.7 $\pm$ 0.2      |
|                        | JAX00704097    | 9   | 103                | 4.6       | 2.5       | 94-105  | 2.1   | 0.2 $\pm$ 0.1              | 0.8 $\pm$ 0.2      |
|                        | JAX00063060    | 15  | 66                 | 6.9       | 3.2       | 48-69   | 1.6   | 0.5 $\pm$ 0.1              | -0.1 $\pm$ 0.2     |
|                        | JAX00415862    | 16  | 24                 | 4.3       | 2.1       | -29     | 1.5   | -0.4 $\pm$ 0.1             | 0.4 $\pm$ 0.2      |
| % Fat                  | JAX00189941    | 6   | 119                | 5.5       | 2.8       | 112-127 | 0.5   | -0.4 $\pm$ 0.2             | -0.1 $\pm$ 0.2     |
|                        | JAX00170532    | 9   | 42                 | 5.5       | 2.2       | 30-65   | 2.2   | 0.6 $\pm$ 0.2              | 0.6 $\pm$ 0.3      |
|                        | JAX00043830    | 13  | 40                 | 4.6       | 1.8       | 34-49   | 1.2   | 0.5 $\pm$ 0.2              | -0.2 $\pm$ 0.3     |
|                        | JAX00057997    | 14  | 119                | 4.4       | 2.3       | 103-    | 1.4   | -0.5 $\pm$ 0.2             | 0.6 $\pm$ 0.3      |
|                        | JAX00405318    | 15  | 72                 | 5.1       | 1.9       | 48-82   | 2.7   | 0.5 $\pm$ 0.2              | 0.8 $\pm$ 0.3      |
|                        | JAX00073232    | 17  | 6                  | 4.5       | 1.9       | -23     | 2.4   | -0.2 $\pm$ 0.2             | -1.0 $\pm$ 0.3     |
| % Lean                 | JAX00476173    | 19  | 35                 | 6.8       | 2.5       | 27-43   | 3.5   | -0.7 $\pm$ 0.2             | -1.0 $\pm$ 0.3     |
|                        | JAX00624709    | 6   | 123                | 4.9       | 2.4       | 104-138 | 0.4   | 0.4 $\pm$ 0.2              | 0.03 $\pm$ 0.28    |
|                        | JAX00645933    | 7   | 86                 | 5.7       | 2.8       | 74-106  | 3.2   | 0.6 $\pm$ 0.2              | -1.1 $\pm$ 0.3     |
|                        | JAX00033353    | 12  | 13                 | 7.2       | 2.7       | -25     | 3.0   | 0.9 $\pm$ 0.2 <sup>†</sup> | -0.2 $\pm$ 0.3     |
|                        | JAX00043830    | 13  | 40                 | 5.5       | 2.2       | 37-45   | 1.7   | -0.6 $\pm$ 0.2             | 0.5 $\pm$ 0.3      |
|                        | JAX00057997    | 14  | 119                | 4.1       | 2.2       | 97-     | 1.6   | 0.5 $\pm$ 0.2              | -0.7 $\pm$ 0.3     |

|                        |             |    |     |     |     |         |     |                       |                       |
|------------------------|-------------|----|-----|-----|-----|---------|-----|-----------------------|-----------------------|
|                        | JAX00476173 | 19 | 34  | 8.7 | 3.2 | 29-44   | 4.7 | 1.0±0.2 <sup>†</sup>  | 1.1±0.3               |
| <i>~6 weeks of age</i> |             |    |     |     |     |         |     |                       |                       |
| Body mass (g)          | JAX00008766 | 1  | 123 | 6.0 | 3.0 | 91-141  | 1.1 | 0.5±0.2               | 0.2±0.3               |
|                        | JAX00127317 | 5  | 15  | 6.6 | 3.2 | -27     | 0.7 | -0.4±0.2              | -0.3±0.3              |
|                        | JAX00645408 | 7  | 83  | 6.0 | 3.0 | 78-85   | 1.5 | 0.3±0.2               | 0.8±0.3               |
|                        | JAX00062446 | 15 | 58  | 4.4 | 2.1 | 27-71   | 0.6 | 0.4±0.2               | -0.1±0.3              |
|                        | JAX00415862 | 16 | 24  | 5.8 | 2.9 | -27     | 1.3 | -0.6±0.2              | 0.3±0.3               |
| % Fat                  | JAX00567938 | 4  | 136 | 4.2 | 2.0 | 119-139 | 2.2 | -0.8±0.2              | -0.4±0.3              |
|                        | JAX00645933 | 7  | 86  | 5.4 | 3.0 | 74-116  | 4.0 | -0.8±0.2              | 1.3±0.3 <sup>†</sup>  |
|                        | JAX00033353 | 12 | 13  | 7.0 | 3.3 | -26     | 3.4 | -1.1±0.2 <sup>†</sup> | 0.3±0.3               |
|                        | JAX00057997 | 14 | 119 | 5.3 | 3.2 | 109-    | 2.8 | -0.9±0.2 <sup>†</sup> | 0.7±0.3               |
|                        | JAX00431384 | 17 | 10  | 5.7 | 2.8 | -17     | 2.7 | -0.04±0.22            | -1.4±0.3 <sup>†</sup> |
| % Lean                 | JAX00474575 | 19 | 27  | 4.0 | 1.9 | 18-43   | 2.5 | -0.3±0.2              | -1.3±0.3              |
|                        | JAX00300375 | 10 | 119 | 4.1 | 2.1 | 111-    | 2.8 | 1.1±0.2 <sup>†</sup>  | -0.5±0.3              |
|                        | JAX00073232 | 17 | 7   | 5.4 | 3.0 | -12     | 2.5 | -0.03±0.23            | 1.4±0.3               |
| <i>~8 weeks of age</i> |             |    |     |     |     |         |     |                       |                       |
| Body mass (g)          | JAX00511966 | 2  | 172 | 4.0 | 1.8 | 168-    | 1.2 | -0.4±0.2              | -0.8±0.3              |
|                        | JAX00645408 | 7  | 83  | 6.7 | 3.2 | 80-84   | 1.4 | 0.4±0.2               | 0.9±0.3               |
|                        | JAX00700236 | 9  | 83  | 4.4 | 2.1 | 79-90   | 0.6 | 0.3±0.2               | 0.6±0.3               |
| % Fat                  | JAX00010715 | 1  | 149 | 5.6 | 3.4 | 117-151 | 1.9 | 0.8±0.2               | 0.1±0.3               |
|                        | JAX00538751 | 3  | 136 | 4.0 | 2.1 | 129-144 | 5.7 | -1.5±0.2 <sup>†</sup> | 1.1±0.3               |
|                        | JAX00567938 | 4  | 135 | 4.0 | 2.1 | 116-139 | 2.2 | -0.9±0.2              | -0.3±0.3              |
|                        | JAX00190133 | 7  | 80  | 5.6 | 3.3 | 68-87   | 5.0 | -0.8±0.2              | 1.7±0.3 <sup>†</sup>  |
|                        | JAX00078883 | 17 | 83  | 4.3 | 2.2 | 71-     | 1.0 | 0.4±0.2               | -0.7±0.3              |
| % Lean                 | JAX00010715 | 1  | 148 | 5.8 | 3.2 | 136-157 | 1.7 | -0.7±0.2              | -0.05±0.31            |

|                      |             |    |     |     |     |         |     |                       |                       |
|----------------------|-------------|----|-----|-----|-----|---------|-----|-----------------------|-----------------------|
|                      | JAX00608826 | 6  | 47  | 4.1 | 2.5 | 27-56   | 2.8 | -0.9±0.2 <sup>†</sup> | -0.5±0.3              |
|                      | JAX00169834 | 9  | 33  | 6.0 | 3.1 | 30-69   | 3.2 | -1.0±0.2 <sup>†</sup> | 0.4±0.3               |
|                      | JAX00300375 | 10 | 119 | 4.1 | 2.2 | 112-122 | 1.6 | 0.6±0.2               | -0.9±0.3              |
|                      | JAX00078883 | 17 | 83  | 3.9 | 2.0 | 68-     | 1.0 | -0.4±0.2              | 0.6±0.3               |
| <i>Post exercise</i> |             |    |     |     |     |         |     |                       |                       |
| Body mass (g)        | JAX00511966 | 2  | 172 | 4.8 | 2.1 | 163-    | 1.2 | -0.4±0.2              | -0.6±0.3              |
|                      | JAX00645408 | 7  | 83  | 5.3 | 2.5 | 77-85   | 1.0 | 0.4±0.2               | 0.6±0.3               |
|                      | JAX00166114 | 8  | 112 | 4.4 | 2.1 | 95-117  | 0.8 | -0.4±0.2              | 0.4±0.3               |
|                      | JAX00700236 | 9  | 83  | 4.0 | 2.0 | 76-105  | 0.5 | 0.2±0.2               | 0.4±0.3               |
|                      | JAX00062446 | 15 | 58  | 4.4 | 2.0 | 26-70   | 0.5 | 0.4±0.2               | -0.2±0.3              |
|                      | JAX00415862 | 16 | 24  | 4.8 | 2.2 | -29     | 0.9 | -0.5±0.2              | 0.09±0.28             |
| % Fat                | JAX00094839 | 2  | 60  | 4.3 | 1.9 | 53-66   | 4.6 | 0.8±0.1 <sup>†</sup>  | -0.4±0.2              |
|                      | JAX00619072 | 6  | 98  | 4.2 | 2.4 | 94-110  | 1.2 | -0.2±0.1              | -0.6±0.2              |
|                      | JAX00695061 | 9  | 57  | 4.7 | 2.5 | 51-71   | 1.5 | 0.5±0.2               | -0.002±0.218          |
|                      | JAX00311892 | 11 | 57  | 4.3 | 2.1 | 46-61   | 2.2 | 0.4±0.1               | 0.6±0.2               |
|                      | JAX00033353 | 12 | 13  | 5.3 | 2.5 | -20     | 2.3 | -0.6±0.1 <sup>†</sup> | -0.2±0.2              |
|                      | JAX00405318 | 15 | 72  | 4.3 | 2.0 | 52-76   | 3.2 | 0.2±0.1               | 1.0±0.2 <sup>†</sup>  |
|                      | JAX00071974 | 16 | 85  | 4.9 | 2.4 | 78-89   | 2.4 | 0.6±0.2               | 0.3±0.2               |
|                      | JAX00474575 | 19 | 27  | 4.0 | 1.9 | 24-41   | 2.6 | -0.3±0.2              | -0.8±0.2              |
| % Lean               | JAX00105078 | 3  | 21  | 5.1 | 2.8 | -26     | 4.1 | 0.2±0.2               | -1.2±0.2 <sup>†</sup> |
|                      | JAX00569432 | 4  | 142 | 4.6 | 2.2 | 116-    | 3.5 | 0.8±0.2 <sup>†</sup>  | -0.4±0.2              |
|                      | JAX00695061 | 9  | 57  | 5.8 | 2.9 | 52-68   | 1.8 | -0.6±0.2              | 0.2±0.2               |
|                      | JAX00311892 | 11 | 57  | 3.9 | 1.9 | 36-61   | 2.6 | -0.4±0.2              | -0.8±0.2              |
|                      | JAX00331009 | 12 | 39  | 5.4 | 3.2 | 28-45   | 4.1 | 0.8±0.2 <sup>†</sup>  | -0.5±0.2              |
|                      | JAX00405318 | 15 | 72  | 4.6 | 2.2 | 50-77   | 3.7 | -0.1±0.1              | -1.2±0.2 <sup>†</sup> |

|                       |             |    |     |     |     |       |     |          |          |
|-----------------------|-------------|----|-----|-----|-----|-------|-----|----------|----------|
|                       | JAX00071974 | 16 | 85  | 4.5 | 2.2 | 77-   | 3.0 | -0.7±0.2 | -0.4±0.2 |
|                       | JAX00474575 | 19 | 27  | 4.6 | 2.2 | 24-37 | 3.0 | 0.4±0.2  | 0.9±0.2  |
| % Change in body mass | JAX00707462 | 9  | 119 | 4.3 | 2.8 | 115-  | 1.8 | -0.9±0.3 | 0.8±0.4  |
| % Change in % fat     | JAX00176095 | 9  | 117 | 4.4 | 3.0 | 113-  | 2.1 | -2.9±1.0 | 3.6±1.4  |

Beginning at 8 weeks of age body composition measures were taken immediately prior to (*pre*) and following (*post*) 6 days of wheel access. Food consumption was quantified as the amount eaten over the entire 6-day access to running wheels and values are presented per gram of body mass [(*pre* wheel access + *post* wheel access) /2]. Percent body fat (and lean) was calculated as (fat mass/body mass)\*100. Percent change variables were calculated as [(*post* – *pre*)/*pre*]\*100. Confidence intervals (CIs) for QTL positions were obtained using a 1.0 LOD drop in Mb. CIs are relative to the GRAIP permuted LOD score with the exception of those denoted by ‡, which are relative to the naive LOD score. Percentage of phenotypic variance accounted for by the QTL effect. For additive and dominance effects: positive values indicate increasing effect of the HR allele or increasing effect of the heterozygote, respectively. †Indicates additive and dominance effects were statistically significant at  $P < 0.05$ . Body mass QTL at ~8weeks of age have been previously published in Kelly et al. (23) and are simply reproduced here for completeness.
